# Supplementary material
Source: publisher site journal article supplement (https://vcs.pensoft.net/article/98324/download/suppl/37/)
Supplement: Supplementary file 1

Supplementary material to

**Dengler, J., Jansen, F., ... & Gillet, F. (2023) Ecological Indicator Values for Europe (EIVE) 1.0. *Vegetation Classification and Survey*.**

**Supplementary material 7.** Comparison of different metrics of niche width regarding their distribution and the correlations between temperature EIVE and GBIF-derived bioclimatic variables.

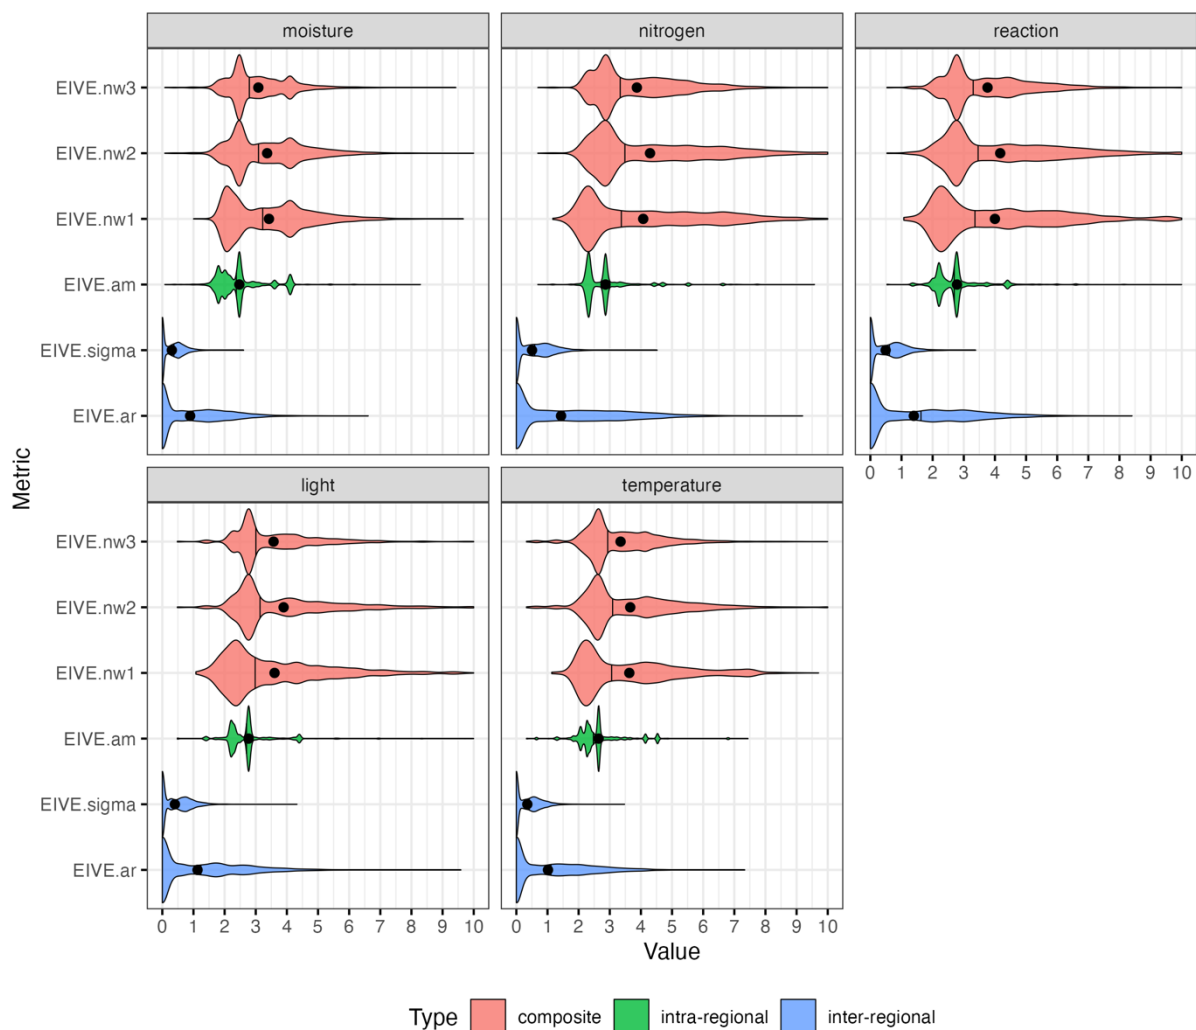

**Figure S7.1.** Equal-width violin plots of EIVE niche width metrics. Inter-regional metrics: position range (*EIVE.ar*), position standard deviation (*EIVE.sigma*). Intra-regional metric: average amplitude (*EIVE.am* with missing values assigned to the mean). Composite metrics: total range (*EIVE.nw1*), average amplitude + position range (*EIVE.nw2*), average amplitude + twice position standard deviation (*EIVE.nw3*). Points represent the means, vertical lines the medians of the distribution.

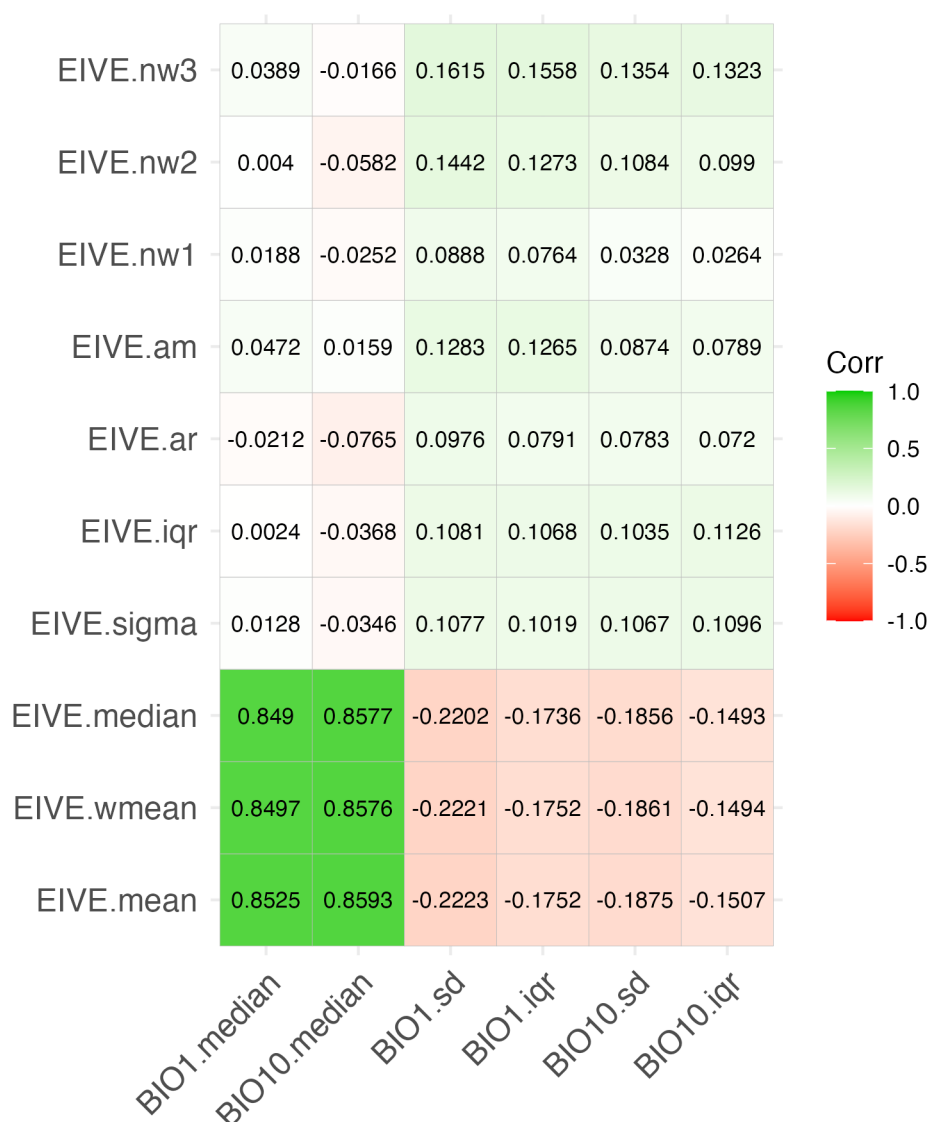

**Figure S7.2.** Pearson correlations between EIVE temperature niche position and width metrics and GBIF-CHELSA bioclimatic variables ( $n = 9446$  species whose GBIF names match EIVE names). BIO1 is the mean annual air temperature and BIO10 the mean daily air temperature of the warmest quarter. Median, standard deviation and interquartile range (Q3 – Q1) of each bioclimatic variable are compared to EIVE metrics: position standard deviation (EIVE.sigma), position interquartile range (EIVE.iqr), position range (EIVE.ar), average amplitude (EIVE.am with missing values assigned to the mean), total range (EIVE.nw1), average amplitude + position range (EIVE.nw2), average amplitude + twice position standard deviation (EIVE.nw3).

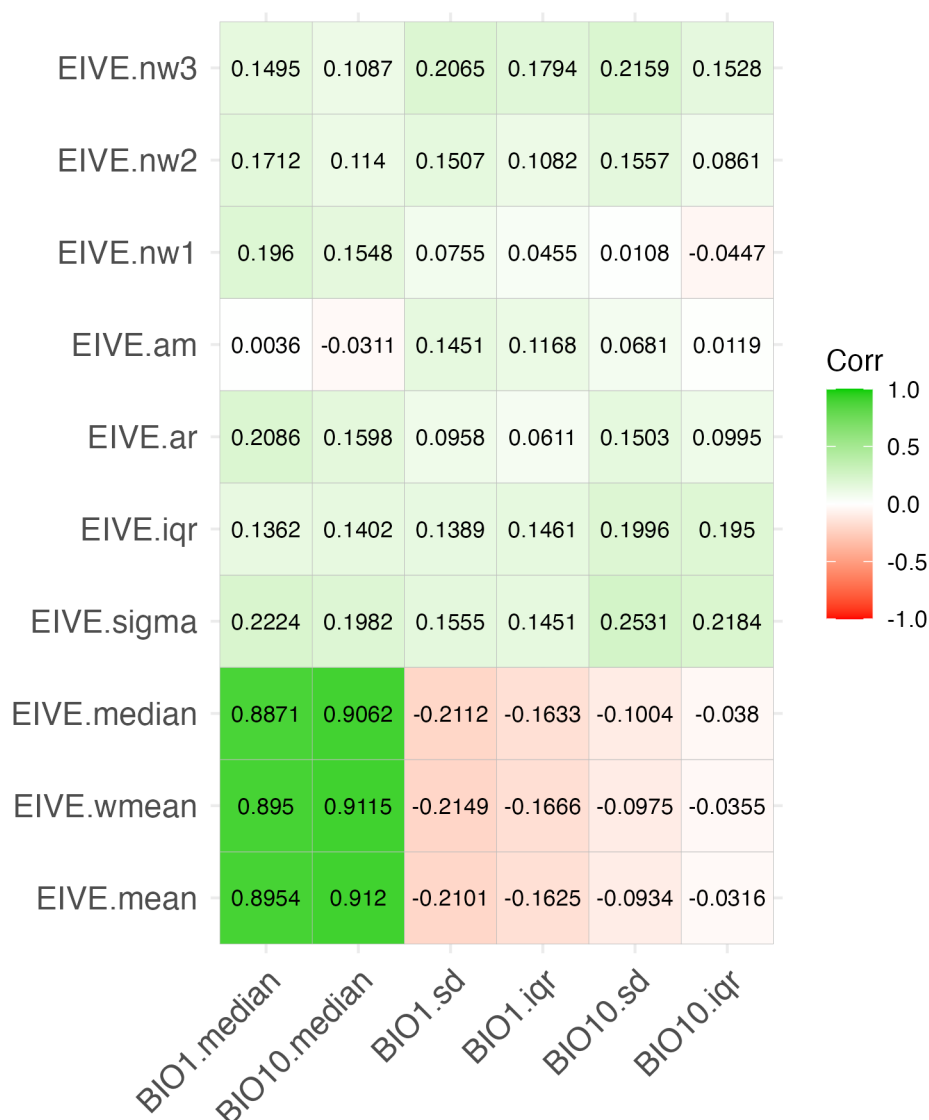

**Figure S7.3.** Pearson correlations between EIVE temperature niche position and width metrics and GBIF-CHELSA bioclimatic variables ( $n = 3438$  species occurring in at least four EIV systems, and whose GBIF names match EIVE names). BIO1 is the mean annual air temperature and BIO10 the mean daily air temperature of the warmest quarter. Median, standard deviation and interquartile range ( $Q3 - Q1$ ) of each bioclimatic variable are compared to EIVE metrics: position standard deviation (*EIVE.sigma*), position interquartile range (*EIVE.iqr*), position range (*EIVE.ar*), average amplitude (*EIVE.am* with missing values assigned to the mean), total range (*EIVE.nw1*), average amplitude + position range (*EIVE.nw2*), average amplitude + twice position standard deviation (*EIVE.nw3*).
